# Supplementary material for: An impulsive, electropulsation-driven backflow in microchannels during electroporation
Source: Royal Society of Chemistry journal article supplement (doi:10.1039/b714371k), 2007-12-10
Supplement: b714371k.pdf [file b714371k.pdf]

# An impulsive, electropulsation-driven backflow in microchannels during electroporation

Won Gu Lee,<sup>a</sup> Hyunwoo Bang,<sup>a</sup> Hoyoung Yun,<sup>a</sup> Junggi Min,<sup>a</sup> Chanil Chung,<sup>b</sup> Jun Keun Chang,<sup>b</sup> and Dong-Chul Han<sup>a\*</sup>

<sup>a</sup> School of Mechanical & Aerospace Engineering and Institute of Advanced Machinery & Design, Seoul National University, Shinlim, Kwanak, Seoul 151-742, Republic of Korea. Fax: 82-2-877-2307; Tel: 82-2-880-7139; E-mail: dchan@snu.ac.kr  
<sup>b</sup> NanoEntek Inc., 12<sup>th</sup> floor Ace Highend Tower, Kuro, Kuro, Seoul 152-711, Republic of Korea.

## Formulation of Eq. 1 for the resultant EOF

The pressure driven flow of an incompressible fluid through a straight channel is the Poiseuille flow. We found that a sudden pressure difference  $\Delta p$  by gases formed at the electrodes resulted in an impulsive flow rate  $Q_G$ . This result can be summarized in the Hagen-Poiseuille law

$$Q_G = \frac{1}{R_{hyd}} \Delta p, \quad (S1)$$

where the proportionality factor  $R_{hyd}$  is a hydraulic resistance. The Hagen-Poiseuille law of Eq. S1 is completely analogous to Ohm's law ( $I = \Delta V / R$ ). For the straight channel with a rectangular cross-section, the  $R_{hyd}$  can be described as follows

$$R_{hyd} = \frac{12\eta L}{1 - 0.63\alpha} \frac{1}{h^3 w}, \quad (S2)$$

where  $\eta$  is the viscosity of liquid,  $\alpha$  is the aspect ratio of the microchannel ( $=h/w$ ),  $h$  is the height,  $w$  is the width, and  $L$  is the length of the microchannel, respectively.

Typically, the flow rate by the electric double layer (EDL) for a cross sectional area,  $A$  ( $=wh$ ) can be represented as

$$Q_{EDL} = Av_{EDL}, \text{ for } \lambda_D \ll \frac{1}{2}h \quad (\text{S3a})$$

$$v_{EDL} \equiv \frac{\varepsilon\zeta E}{\eta}, \quad (\text{S3b})$$

where  $v_{EDL}$  is the velocity of the liquid driven by the EDL,  $\lambda_D$  is the thickness of Debye layer,  $\varepsilon$  is a dielectric constant of the liquid,  $\zeta$  is zeta potential of the microchannel and  $E$  is the electric field strength across the microchannel ( $=\Delta V/L$ ). The flow rate of the resultant EOF with impulsive back pressure can be simply derived into the following form,

$$\begin{aligned} Q_{EOF} &= Q_{EDL} - Q_G \\ &= Av_{EDL} - \frac{1}{R_{hyd}} \Delta p \\ &= \frac{A\varepsilon\zeta}{\eta L} \Delta V - \frac{1-0.63\alpha}{12\eta L} wh^3 \Delta p \\ &= C_1 \Delta V - C_2 \Delta p \end{aligned} \quad \text{for } \lambda_D \ll \frac{1}{2}h \quad (\text{S4})$$

where  $C_1$  and  $C_2$  are coefficients for the EDL and gas evolution which result in the EOF. Note that the vapor pressure is in general increasing exponentially with the temperature. In addition, there is a close correlation between the temperature rise and electric current by Joule's law. At the moment of electropulsation, the impulsive back pressure cancels the flow by  $Q_{EDL}$  and instantly changes the direction of EOF in microchannels.
